# Supplementary material for: Characterizing Urban Planetary Boundary Layer Dynamics Using 3-Year Doppler Wind Lidar Measurements in a Western Yangtze River Delta City, China
Source: Copernicus journal article supplement (doi:10.5194/amt-2024-178), 2024-10-28
Supplement: Supplementary file [file amt-2024-178-AC2-supplement.pdf]

---

Manuscript ID: AMT-2024-178

Title: Characterizing Urban Planetary Boundary Layer Dynamics Using 3-Year Doppler Wind Lidar Measurements in a Western Yangtze River Delta City, China

Authors: Tianwen Wei, Mengya Wang, Kenan Wu, Jinlong Yuan, Haiyun Xia, and Simone Lolli

---

Dear editor and reviewers

On behalf of the co-authors, thank you for giving us an opportunity to address the reviewers' concerns. We appreciate all the great efforts and constructive comments from the reviewers. We have revised the manuscript carefully according to the reviewer' comments and suggestions. Our point-by-point responses are appended below. All changes made in the revised manuscript are marked in blue. Attached please find the revised version of the manuscript, which we would like to submit for your kind consideration. We are looking forward to hearing from you!

Best regards!

Sincerely yours,

Tianwen Wei

School of Atmospheric Physics,

Nanjing University of Information Science & Technology

219 Ningliu rd. Nanjing, Jiangsu, CHINA, 210044.

---

**Anonymous Referee 2:**

The paper deals with the analyses and exploitations of Doppler lidar measurements for a period of 3 years (2009-2022) in the city of Hefei, China. The focus is on the study of urban planetary boundary layer (PBL) deriving critical aspects such as low-level jets (LLJs), mixing layer height (MLH), wind shear intensity and turbulence kinetic energy dissipation rates (TKEDR). The study is well-structured, and I really appreciate that the analyses are supported by the data shown. I believe that the present study provides insight into PBL studies and is suitable for its publication in AMT.

We sincerely thank Reviewer 2 for constructive comments and suggestions, which have significantly improved the quality of our manuscript. Below, we provide our point-by-point responses to the comments:

I agree with the previous referee's comments and the analysis could be enriched. My suggestion is to add some specific study cases that serve to better illustrate the different situations that affect PBL and the rest of parameters.

Thank you for your valuable suggestion regarding the inclusion of case studies to enrich the analysis. While we acknowledge that detailed case studies can provide deeper insights into the dynamics of the planetary boundary layer under specific conditions, the primary focus of this study is to statistically characterize the diurnal and seasonal variations of key parameters, such as LLJs, MLH, and TKEDR. Instead, we have enhanced the analysis by expanding the discussions in the results section of the revised manuscript.

In future studies, we plan to conduct case-specific analyses under varying environmental conditions, incorporating aerosol observations and numerical simulations to further explore the interactions between the PBL dynamics and aerosol distributions. These efforts will complement the

findings of the current study and provide a more comprehensive understanding of boundary layer processes.

My only concern is that in the current state the conclusions section is only a summary, I miss the point out what are the novelties of the study, the limitations and the steps for the future.

Thank you for your valuable suggestion. We have rewrite the conclusions section to highlight the novelties, the limitations and the steps for the future study.

“This study utilized three years of Doppler wind lidar measurements (from June 2019 to June 2022) to characterize the PBL dynamics over Hefei, a rapidly developing city in the western YRD, China. By analyzing key parameters such as wind profiles, low-level jets, turbulence, and boundary layer height, this study provides a detailed characterization of the seasonal and diurnal variability of urban PBL dynamics in a monsoon-influenced subtropical environment.

The results showed that HWS steady increase from 2 to 7 m s<sup>-1</sup> between 300 m and 3 km AGL, with a more rapid acceleration above 3 km, particularly in autumn and winter. Westerly winds ( $270^{\circ} \pm 15^{\circ}$ ) dominated above 3 km, while wind directions within the PBL were more variable, influenced by local topography and surface roughness. LLJs primarily formed at sunset and dissipated by noon, typically occurring at altitudes between 0.5 and 0.6 km throughout the year, except in July. LLJ occurrences were most frequent in spring (31.7%), followed by summer (24.7%), autumn (22.3%), and winter (21.3%), with the strongest LLJs observed in summer, extending up to 1.5 km.

Strong wind speed gradients below the LLJs induced large VWSH (up to 0.02 s<sup>-1</sup>) and elevated TKEDR (up to 10<sup>-2</sup> m<sup>2</sup>s<sup>-3</sup>) in the near-surface layer at night, promoting vertical mixing of pollutants. Seasonal wind direction shifts of LLJ nose (e.g., southerly in summer and northeasterly in winter) reflected the interplay between monsoonal flows and local topography. During the daytime, TKEDR increased and extend toward higher altitudes with the transport of heat, momentum and mass. Turbulence mixing slowed down wind speeds by increasing surface friction, forming a gentler wind zone and reducing shear intensity. An interesting fluctuation in TKEDR above the MLH top during early summer afternoons was attributed to atmospheric instability after continuous surface heating.

The dynamics-based MLH exhibited smaller fluctuations and lower standard deviations compared to the aerosol-based BLH. The MLH peaked between 2:00 p.m. and 3:00 p.m., reaching ~1.2 km in spring and summer, slightly lower in autumn, and around 0.8 km in winter. After sunset, it eventually returned to a shallow well-mixed layer near the ground (~350 m in spring and summer, and ~250 m in autumn and winter). Compared to clear days, cloud cover reduces the MLH by about 200 m at the afternoon peak time, while increasing it by approximately 100 m at night. These results quantified the different influence of cloud coverage to the development of MLH during day and night.

In conclusion, this study leverages the high temporal and spatial resolution of Doppler wind lidar to provide a detailed characterization of urban PBL dynamics, offering valuable insights into their complex interactions with surface heating and cooling, atmospheric stability, cloud, and synoptic-scale weather systems. Long-term lidar observations of LLJs, MLH, and TKEDR provide critical insights into vertical mixing, turbulence, and pollutant transport in a monsoon-influenced subtropical environment, enriching the climatological understanding of LLJs and PBL processes over the western Yangtze River Delta. These results have also significant practical implications, serving as valuable references for local standards and regional planning by supporting strategies for urban air quality management and the development of low-altitude economic activities. Specifically, the results inform vertical zoning for applications such as wind energy development and drone logistics, guiding optimal

turbine placement and flight route planning. Overall, this study underscores the importance of lidar-based observations in addressing regional atmospheric challenges and advancing environmental and economic sustainability.

Despite these insights, this study is constrained to a single urban observational site and focuses on statistical analysis. Future research will extend observations to multiple sites, including urban, suburban, and rural to comprehensively capture the spatial variability of PBL processes and LLJ characteristics across different land-use types and topographic conditions. Additionally, subsequent studies will conduct specific case analyses under varying meteorological scenarios, integrating aerosol observations and high-resolution numerical models. These efforts aim to enhance our understanding of the interactions between aerosols, clouds, radiation, and PBL dynamics, particularly their influence on vertical mixing and boundary layer evolution.”

Apart from that, I just detected some typos (i.e. legends axes are sometimes difficult to read, Figure captions can be improved).

Thank you for pointing out the typos in our manuscript. We have carefully reviewed the manuscript, improved the figure captions to provide more detailed explanations and ensure that the legends are clear and easy to read. Specifically, we have adjusted the color schemes in Figures 4 to improve readability. Additionally, we have ensured consistency in terminology and formatting throughout the manuscript for improved clarity and coherence. The detailed corrections are highlighted in the red-line version of the revised manuscript.

**Other changes:**

**We added a new affiliation:**

“2China Meteorological Administration Xiong’an Atmospheric Boundary Layer Key Laboratory, Xiong’an New Area, Baoding 071800, China”

**We added a new Financial support:**

“the China Meteorological Administration Xiong’an Atmospheric Boundary Layer Key Laboratory (2023LABL-B11)”

**We added some related references:**

Barlow, J. F.: Progress in observing and modelling the urban boundary layer, *Urban Clim.*, 10, 216–240, <https://doi.org/10.1016/j.uclim.2014.03.011>, 2014.

Barlow, J. F., Dunbar, T. M., Nemitz, E. G., Wood, C. R., Gallagher, M. W., Davies, F., O’Connor, E., and Harrison, R. M.: Boundary layer dynamics over London, UK, as observed using Doppler lidar during REPARTEE-II, *Atmospheric Chem. Phys.*, 11, 2111–2125, <https://doi.org/10.5194/acp-11-2111-2011>, 2011.

Pérez-Ramírez, D., Whiteman, D. N., Veselovskii, I., Colarco, P., Korenski, M., and da Silva, A.: Retrievals of aerosol single scattering albedo by multiwavelength lidar measurements: Evaluations with NASA langley HSRL-2 during discover-AQ field campaigns, *Remote Sens. Environ.*, 222, 144–164, <https://doi.org/10.1016/j.rse.2018.12.022>, 2019.

Pérez-Ramírez, D., Whiteman, D. N., Veselovskii, I., Ferrare, R., Titos, G., Granados-Muñoz, M. J., Sánchez-Hernández, G., and Navas-Guzmán, F.: Spatiotemporal changes in aerosol properties by

hygroscopic growth and impacts on radiative forcing and heating rates during DISCOVER-AQ 2011, *Atmospheric Chem. Phys.*, 21, 12021–12048, <https://doi.org/10.5194/acp-21-12021-2021>, 2021.

Wang, Y., Hu, H., Ren, X., Yang, X.-Q., and Mao, K.: Significant northward jump of the western pacific subtropical high: The interannual variability and mechanisms, *J. Geophys. Res. Atmospheres*, 128, e2022JD037742, <https://doi.org/10.1029/2022JD037742>, 2023.

Wei, T., Wang, M., Jiang, P., Wu, K., Zhang, Z., Yuan, J., Xia, H., and Lolli, S.: Retrieving aerosol backscatter coefficient using coherent doppler wind lidar, *Opt. Express*, 33, 6832–6849, <https://doi.org/10.1364/OE.551730>, 2025.

Yang, K., Cai, W., Huang, G., Hu, K., Ng, B., and Wang, G.: Increased variability of the western pacific subtropical high under greenhouse warming, *Proc. Natl. Acad. Sci.*, 119, e2120335119, <https://doi.org/10.1073/pnas.2120335119>, 2022.
